# Supplementary material for: Hygroscopic Growth and Activation Changed Submicron Aerosol Composition and Properties in North China Plain
Source: Copernicus journal article supplement (doi:10.5194/egusphere-2024-998), 2024-04-23
Supplement: Supplementary file 1 [file egusphere-2024-998-supplement.pdf]

## Supplementary Information

# Hygroscopic Growth and Activation Changed Submicron Aerosol Composition and Properties in North China Plain

Weiqli Xu<sup>1</sup>, Ye Kuang<sup>2</sup>, Wanyun Xu<sup>3</sup>, Zhiqiang Zhang<sup>1,4</sup>, Biao Luo<sup>2</sup>, Xiaoyi Zhang<sup>3,5</sup>, Jiangchuang Tao<sup>2</sup>, Hongqin Qiao<sup>2</sup>, Li Liu<sup>6</sup> and Yele Sun<sup>1,4\*</sup>

<sup>1</sup>State Key Laboratory of Atmospheric Boundary Layer Physics and Atmospheric Chemistry, Institute of Atmospheric Physics, Chinese Academy of Sciences, Beijing 100029, China.

<sup>2</sup>Institute for Environmental and Climate Research, Jinan University, Guangzhou 511443, China

<sup>3</sup>State Key Laboratory of Severe Weather & Key Laboratory for Atmospheric Chemistry, Institute of Atmospheric Composition, Chinese Academy of Meteorological Sciences, Beijing 100081, China

<sup>4</sup>College of Earth and Planetary Sciences, University of Chinese Academy of Sciences, Beijing 100049, China

<sup>5</sup>Department of Atmospheric and Oceanic Sciences, Fudan University, Shanghai, China

<sup>6</sup>Key Laboratory of Regional Numerical Weather Prediction, Institute of Tropical and Marine Meteorology, China Meteorological Administration, Guangzhou, China

*Corresponding author:* Yele Sun ([sunyele@mail.iap.ac.cn](mailto:sunyele@mail.iap.ac.cn)) and Ye Kuang ([kuangye@jnu.edu.cn](mailto:kuangye@jnu.edu.cn))

**Table S1.** A summary of average mass concentrations ( $\mu\text{g m}^{-3}$ ) of PM Species and OA factors under different sizes.

| Properties measured | PM <sub>1</sub> | PM <sub>2.5</sub> | TSP  |
|---------------------|-----------------|-------------------|------|
| Org                 | 11.2            | 12.1              | 12.4 |
| NO <sub>3</sub>     | 8.7             | 9.7               | 9.8  |
| SO <sub>4</sub>     | 1.8             | 2.1               | 2.1  |
| NH <sub>4</sub>     | 3.2             | 3.5               | 3.6  |
| Chl                 | 0.5             | 0.6               | 0.6  |
| FFOA                | 3.4             | 3.6               | 3.7  |
| BBOA                | 2.2             | 2.3               | 2.4  |
| OOA1                | 4.4             | 4.7               | 4.8  |
| OOA2                | 1.3             | 1.4               | 1.5  |

**Table S2.** A summary of average mass concentrations ( $\mu\text{g m}^{-3}$ ) of PM<sub>1</sub> Species and OA factors under different sizes at different RH levels.

| PM <sub>1</sub> /PM <sub>2.5</sub> /TSP | <60%        | 60-80%         | 80-90%         | 90-95%         | 95-99%         | >99%           |
|-----------------------------------------|-------------|----------------|----------------|----------------|----------------|----------------|
| Org                                     | 6.0/6.4/6.7 | 14.5/15.2/15.5 | 16.4/17.4/17.4 | 16.8/17.3/17.3 | 13.3/15.7/15.8 | 12.2/14.7/16.0 |
| NO <sub>3</sub>                         | 5.0/5.2/5.2 | 9.8/10.3/10.3  | 11.9/12.7/12.8 | 13.9/15.3/15.1 | 11.7/15.0/15.1 | 11.5/15.9/17.9 |
| SO <sub>4</sub>                         | 1.0/1.0/1.0 | 2.0/2.1/2.1    | 2.7/3.0/3.0    | 3.1/3.5/3.4    | 2.7/3.6/3.8    | 2.2/3.3/3.9    |
| NH <sub>4</sub>                         | 1.8/1.9/1.9 | 3.5/3.7/3.7    | 4.4/4.7/4.8    | 5.1/5.7/5.6    | 4.3/5.5/5.6    | 4.0/5.6/6.4    |
| Chl                                     | 0.2/0.3/0.3 | 0.6/0.7/0.9    | 0.8/0.9/0.9    | 0.8/0.9/0.9    | 0.6/0.7/0.8    | 0.5/0.6/0.7    |
| FFOA                                    | 1.3/1.5/1.6 | 5.0/5.3/5.3    | 5.8/6.1/6.2    | 5.2/4.9/5.0    | 3.8/4.1/4.3    | 3.4/3.5/3.6    |
| BBOA                                    | 0.8/0.9/1.1 | 3.5/3.7/3.7    | 3.5/3.7/3.7    | 3.2/3.2/3.3    | 2.2/2.6/2.6    | 1.9/2.1/2.2    |
| OOA1                                    | 3.2/3.2/3.3 | 4.7/4.8/4.8    | 5.2/5.4/5.4    | 6.1/6.7/6.7    | 5.5/6.7/6.7    | 5.3/7.3/8.0    |
| OOA2                                    | 0.6/0.6/0.6 | 1.4/1.5/1.5    | 1.9/2.0/2.1    | 2.3/2.6/2.6    | 1.9/2.6/2.7    | 1.8/2.6/2.9    |

**Table S3.** A summary of average mass concentrations ( $\mu\text{g m}^{-3}$ ) of OS and lower bounds of ON under different sizes at different RH levels.

|                         | <60% | 60-80% | 80%-90% | 90-95% | 95-99% | >99% |
|-------------------------|------|--------|---------|--------|--------|------|
| ON in PM <sub>1</sub>   | 1.73 | 2.96   | 3.38    | 3.80   | 2.95   | 3.03 |
| ON in PM <sub>2.5</sub> | 1.81 | 3.04   | 3.50    | 3.75   | 3.10   | 3.79 |
| ON in TSP               | 1.84 | 3.01   | 3.52    | 3.83   | 3.19   | 4.05 |
| OS in PM <sub>1</sub>   | 0.14 | 0.36   | 0.51    | 0.71   | 0.64   | 0.45 |
| OS in PM <sub>2.5</sub> | 0.14 | 0.37   | 0.57    | 0.79   | 0.85   | 0.74 |
| OS in TSP               | 0.15 | 0.38   | 0.57    | 0.78   | 0.89   | 0.88 |

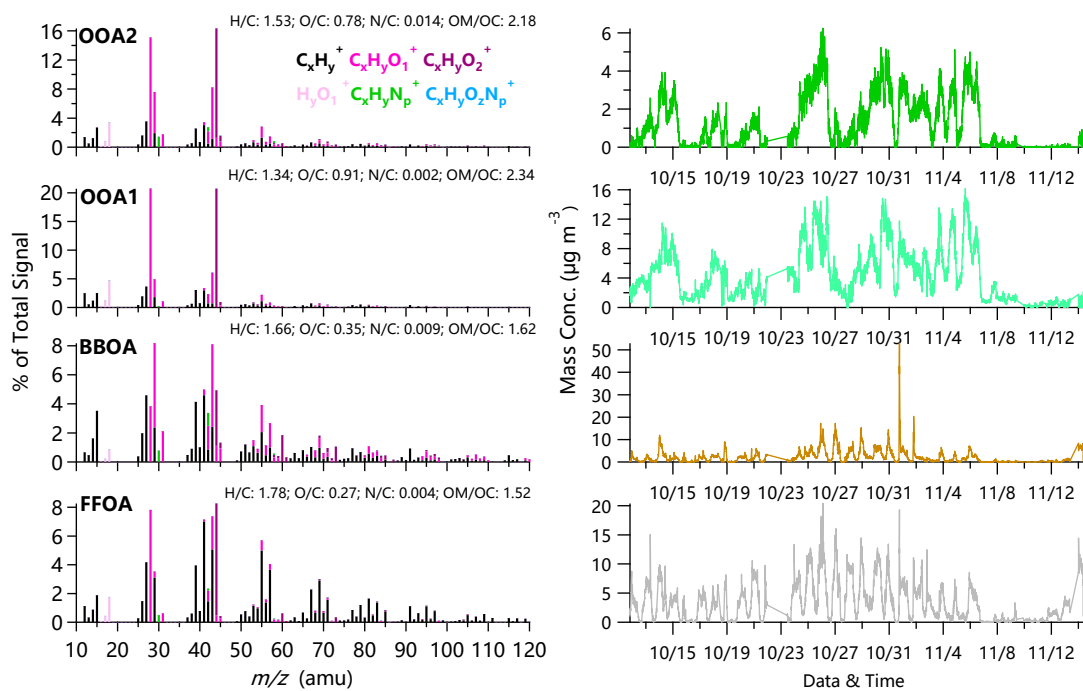

Figure S1. High-resolution mass spectra and mass concentrations of OA factors

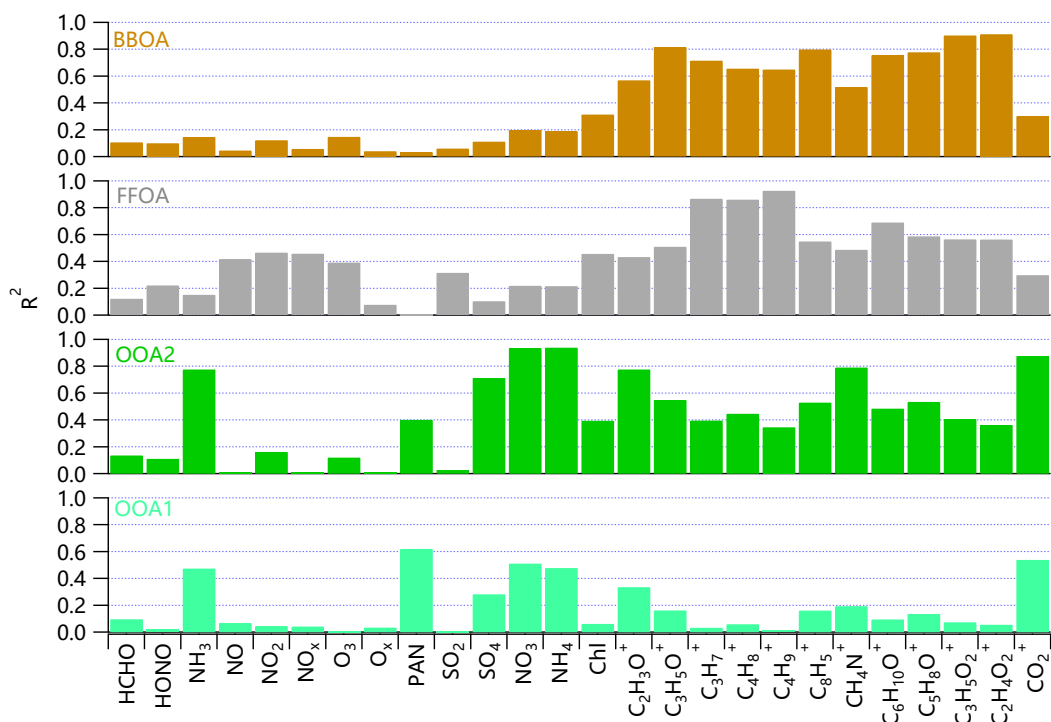

Figure S2. Correlations between OA factors and external species.

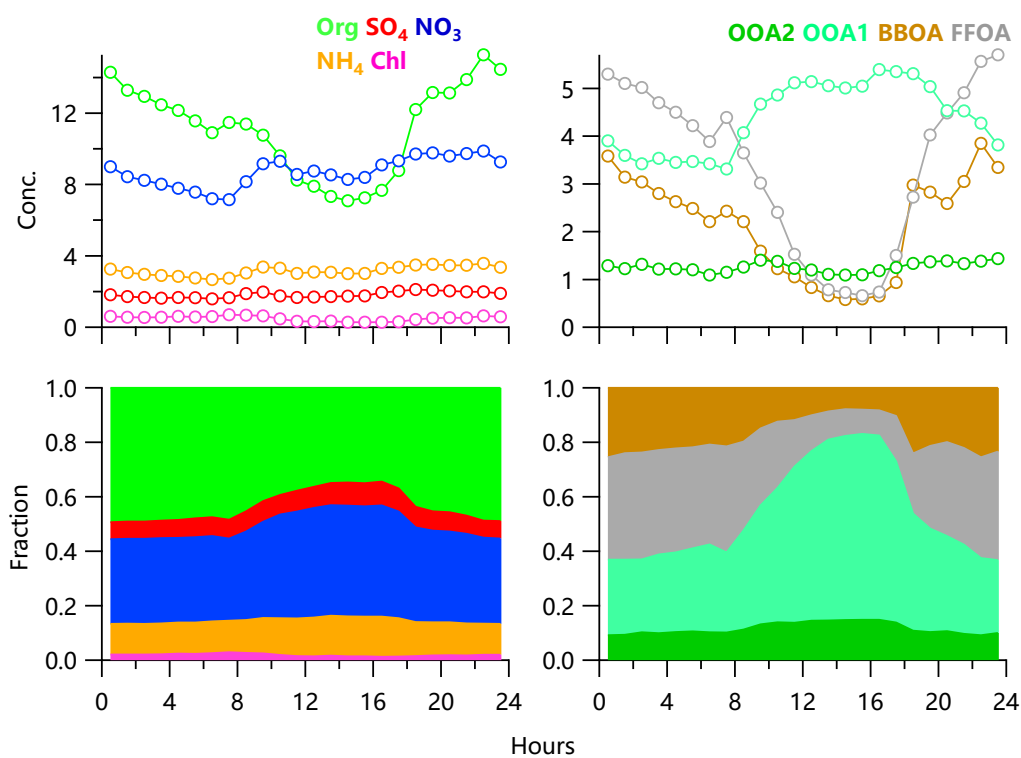

**Figure S3.** Average diurnal cycles of mass concentrations of PM<sub>1</sub> species and OA factors

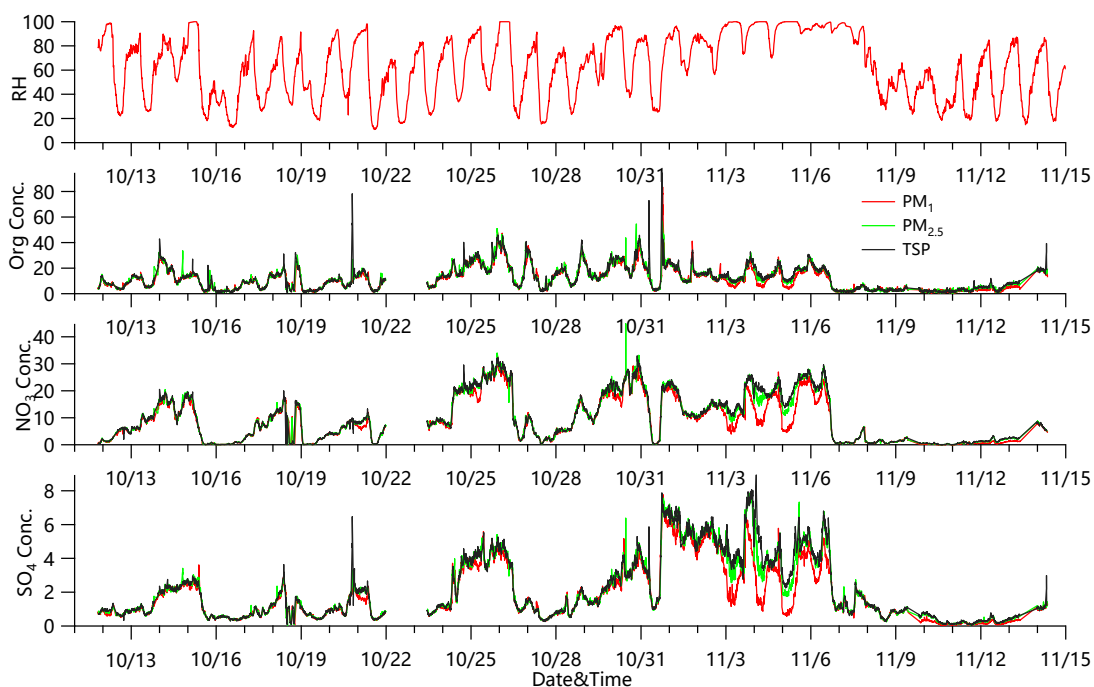

**Figure S4.** Time series of RH, mass concentrations of organics, nitrate and sulfate under different sizes.

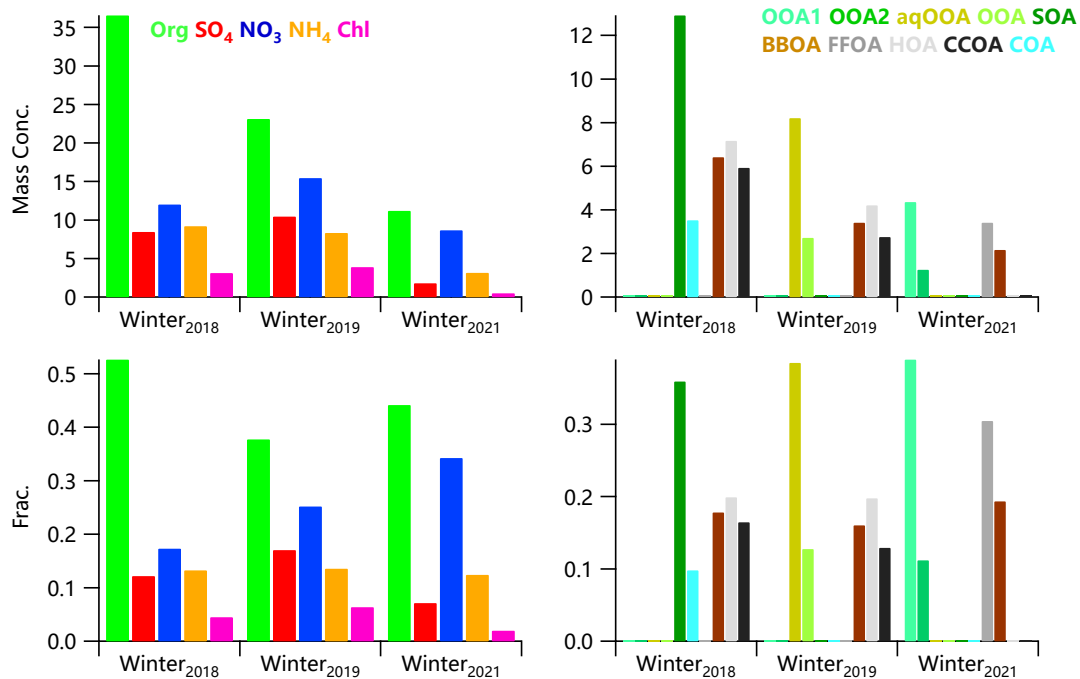

**Figure S5.** Average concentrations and contributions of PM and OA species in winters of 2018, 2019 and 2021 in Gucheng.

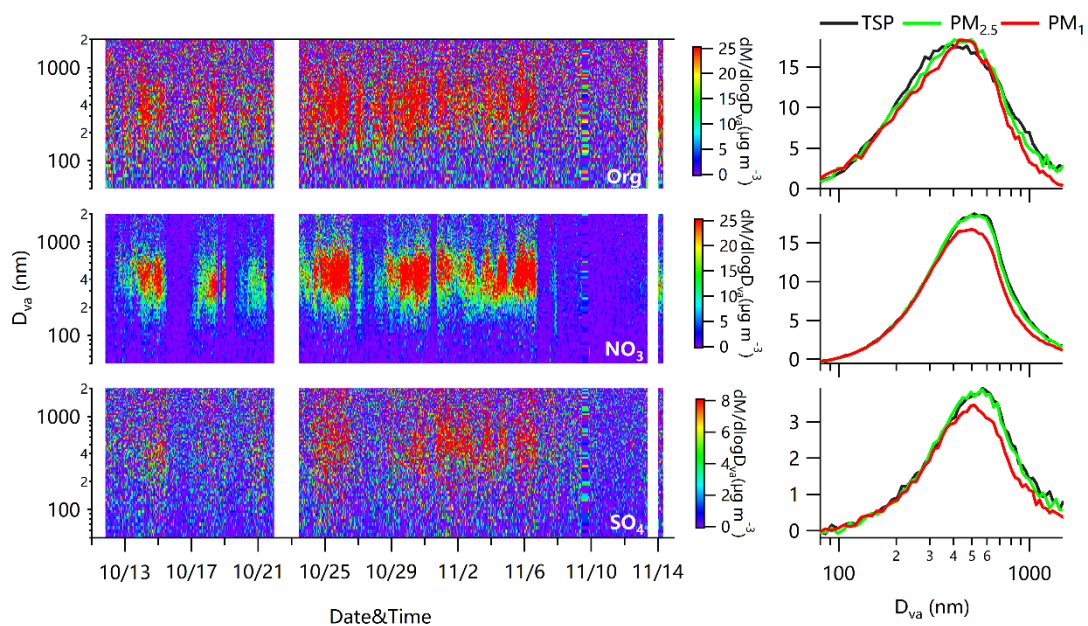

**Figure S6.** Evolution of size distributions of organics, nitrate and sulfate in Gucheng. Average size distributions of organics, nitrate and sulfate under different are also shown.

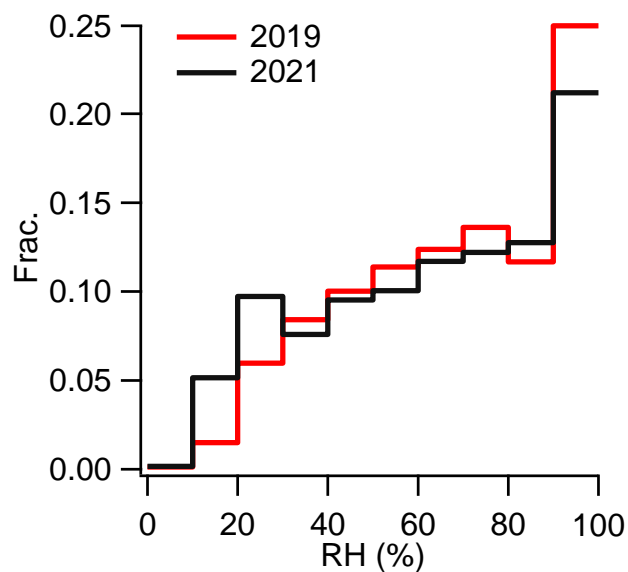

**Figure S7.** Comparisons of frequencies of RH in winters of 2019 and 2021 in Gucheng.

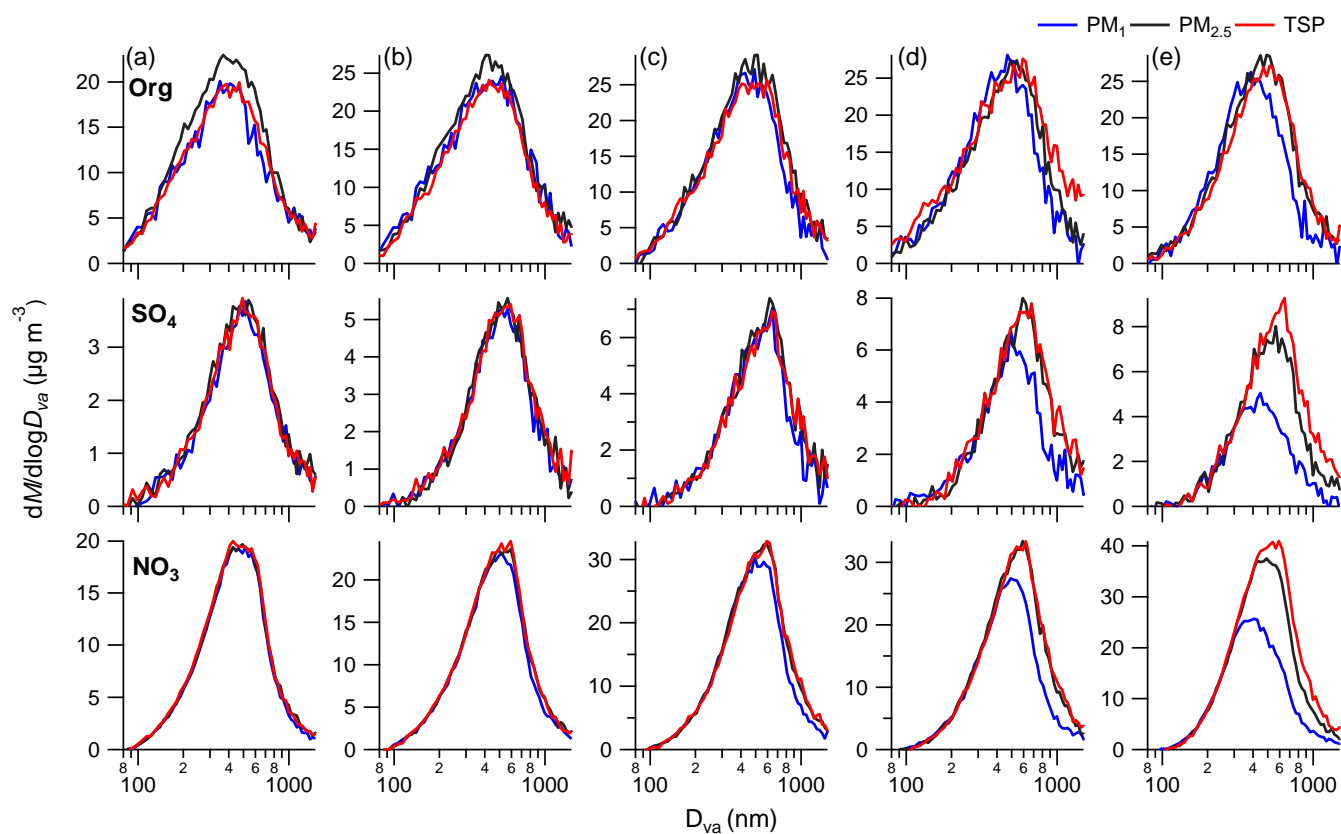

**Figure S8.** Average size distributions of OA, SO<sub>4</sub> and NO<sub>3</sub> under (a)RH=60-80%, (b)RH=80-90%, (c)RH=90-95%, (d)RH=95-99% and (e) RH>99%.

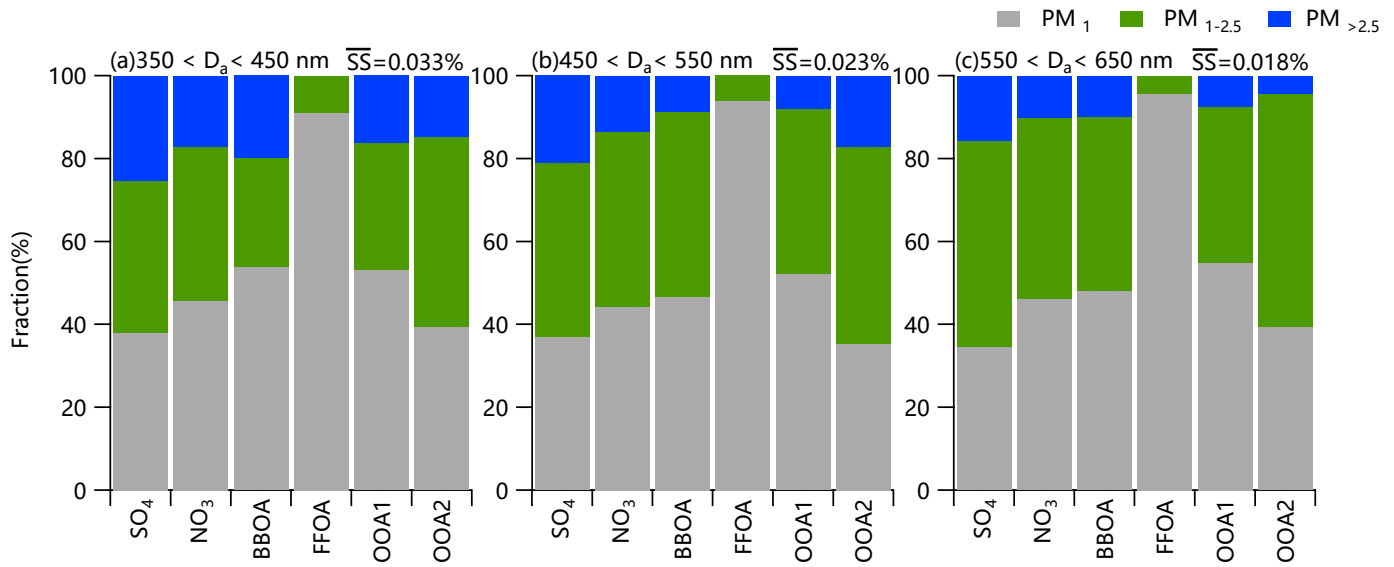

**Figure S9.** Fractions of aerosol compositions that reside in different diameter ranges under critical activation diameter ranges of (a)  $350 < D_a < 450$  nm (b)  $450 < D_a < 550$  nm (c)  $550 < D_a < 650$  nm.

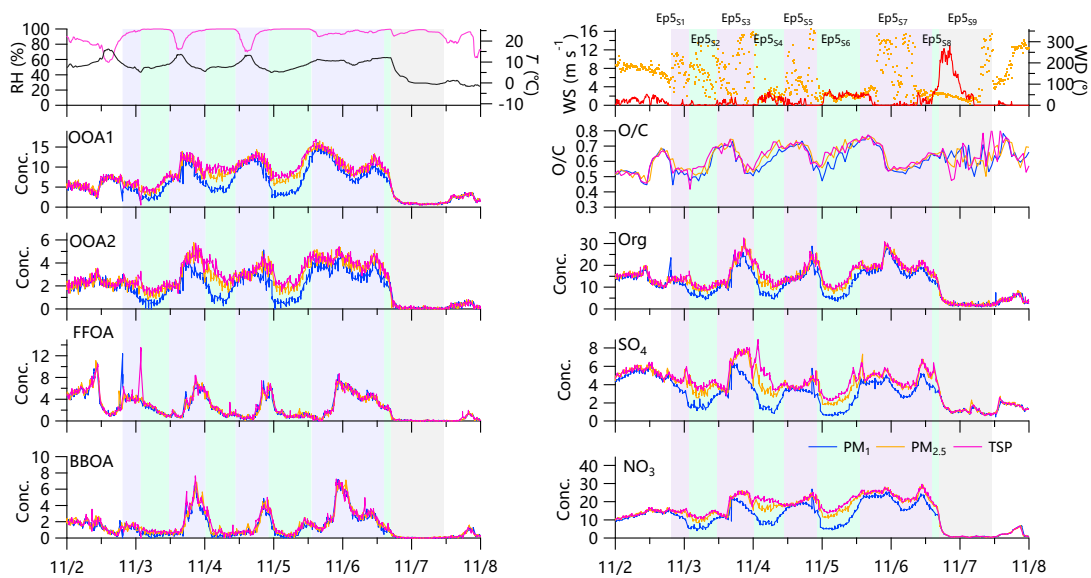

**Figure S10.** Time series of meteorological variables, chemical species under PM<sub>1</sub>, PM<sub>2.5</sub> cyclones and TSP passage during the foggy episodes.

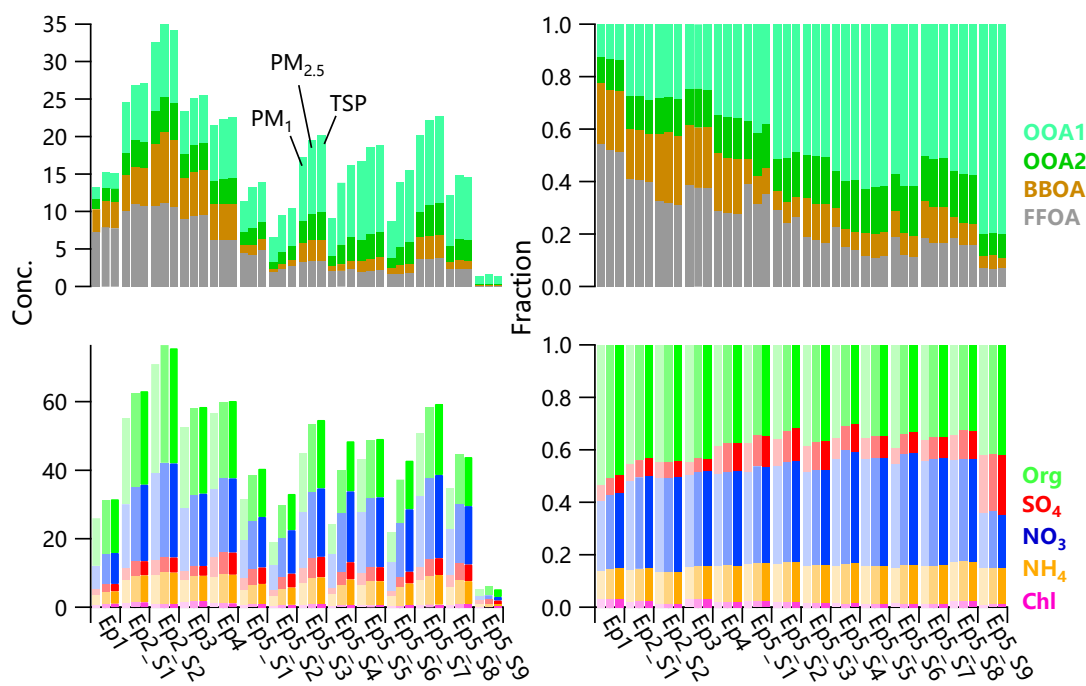

**Figure S11.** Average concentrations and contributions of PM and OA species under different sizes in different stages during foggy periods.

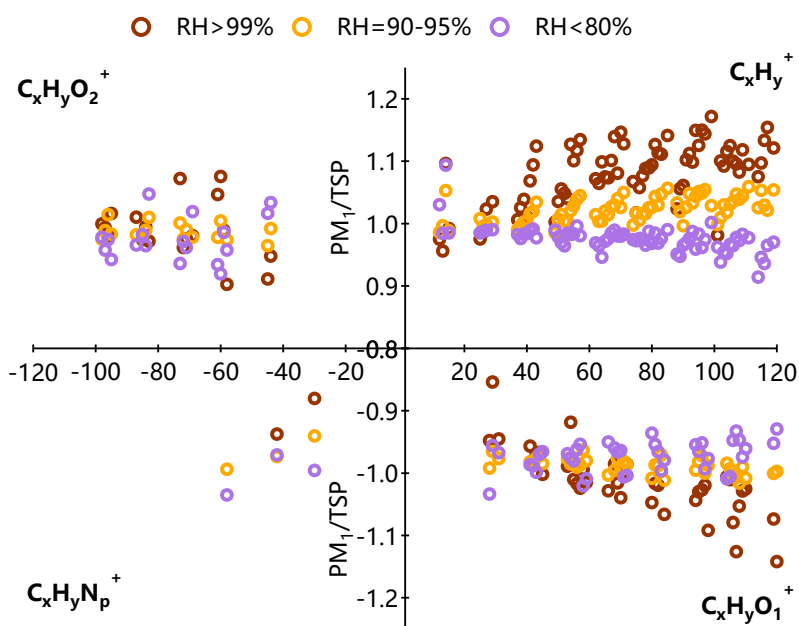

**Figure S12.** The ratios of fraction of  $C_xH_y^+$ ,  $C_xH_yO_1^+$ ,  $C_xH_yO_2^+$ ,  $C_xH_yN_p^+$  family under  $PM_1$  cyclone to TSP passage.
