# Supplementary material for: Hygroscopic Growth and Activation Changed Submicron Aerosol Composition and Properties in North China Plain
Source: Copernicus journal article supplement (doi:10.5194/egusphere-2024-998), 2024-04-23
Supplement: Supplementary file [file egusphere-2024-998-AC2-supplement.pdf]

## Response to Reviewer #2

*This study presents a thorough discussion on how the hygroscopic growth influences the sampling, aerosol size and composition under high RH condition. The datasets and analysis are robust and provide valuable insights for high-RH atmosphere. I have some suggestions.*

We thank the reviewer's comments. We have revised the manuscript accordingly.

*1. During the fog events, atmospheric RH reaches ~100% for nearly half day. At our city, if this happens, usually it's accompanied with precipitation. Is there any precipitation during the observation periods? How frequent is this foggy condition happens at this site and other NCP cities?*

Thanks for the reviewer's comment. Fog accompanied with precipitation typically occurs in mountainous regions or at land-sea boundaries where increased moisture can lead to saturation. In contrast, fog formation in the North China Plain (NCP), especially during autumn and winter, may be accompanied by a significant decrease in temperature under stagnant conditions due to low moisture levels. Fu et al. (2014) summarized the frequency and trends of fogs in the NCP over the past 30 years. In this study, the observed fogs are primarily radiation fog caused by substantial nighttime temperature decreases under calm conditions (i.e., low wind speeds) (Kuang et al., 2024), with no associated precipitation events during the observation period. As this study does not focus on precipitation, it is not discussed in this manuscript."

*2. RH usually has a diurnal variation, which is higher at night and lower at day. When studying the composition and source reliance on RH, the diurnal variation of RH is mixed with the diurnal variations of different composition and PMF factors. How to understand this influence on Figure 5-7?*

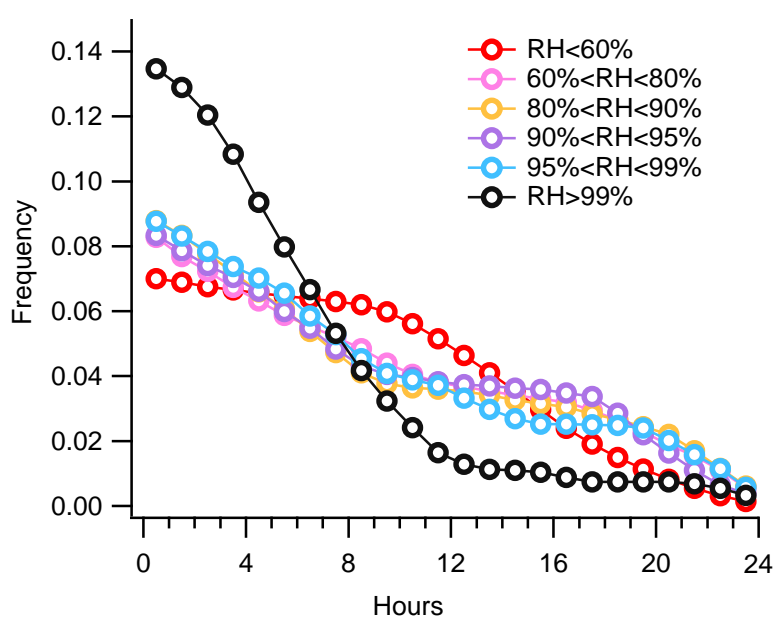

Fig. R1. Diurnal frequencies of different RH levels.

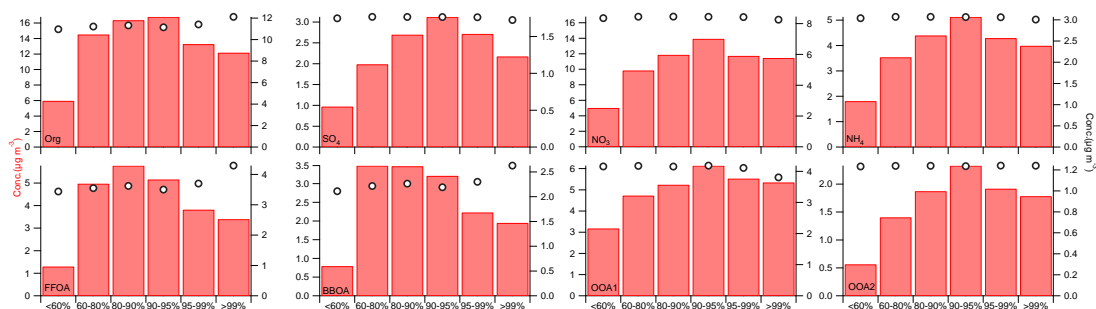

Fig. R2. The concentrations PM and OA species in PM<sub>1</sub>(left axis) and weighted by the diurnal RH frequency only (right axis) under different RH levels.

We thank the reviewer's comments. We do acknowledge the potential impact of diurnal variations of RH on the discussion of the composition and source reliance on RH. As depicted in Fig. R1, there is a higher frequency during 0-4 a.m. under RH>99% and a higher frequency during 8-12 a.m. under RH<60%. This diurnal variation may introduce uncertainties regarding the variation in physicochemical properties under changing RH levels. However, upon further comparison of PM and OA species concentrations weighted by diurnal RH frequency only ( $=\sum_i F_i \times C_i$ , where  $F_i$  and  $C_i$  are the frequency and concentrations for each hour), we observed negligible variations in PM and OA species concentrations under different levels of RH (Fig. R2). These findings differ significantly from those observed in PM<sub>1</sub>. Therefore, the impact of diurnal variations in RH is not considered as the primary influencing factor.

3. The hygroscopic growth will change the particle diameter thus shifting the cut-off size of the impactors. It is better to quantify how much underestimation it will cause to PM<sub>2.5</sub> and PM<sub>1</sub> mass under different RH. This will provide reference for other studies. Following the reviewer's comments, we added the differences between PM<sub>2.5</sub> and PM<sub>1</sub> in mass concentrations and the contribution of PM<sub>1</sub> to PM<sub>2.5</sub> in Table S1.

Table S1. A summary of differences of mass concentrations between TSP, PM<sub>2.5</sub> and PM<sub>1</sub>, and the fraction of PM<sub>1</sub> in PM<sub>2.5</sub> and TSP of PM Species and OA factors under different RH levels.

|                                                          | <60% | 60-80% | 80%-90% | 90-95% | 95-99% | >99% |
|----------------------------------------------------------|------|--------|---------|--------|--------|------|
| PM <sub>2.5</sub> -PM <sub>1</sub> (µg m <sup>-3</sup> ) |      |        |         |        |        |      |
| Org                                                      | 0.4  | 0.7    | 1.0     | 0.5    | 2.4    | 2.5  |
| NO <sub>3</sub>                                          | 0.2  | 0.5    | 0.8     | 1.4    | 3.3    | 4.4  |
| SO <sub>4</sub>                                          | 0.0  | 0.1    | 0.3     | 0.4    | 0.9    | 1.1  |
| NH <sub>4</sub>                                          | 0.1  | 0.2    | 0.3     | 0.6    | 1.2    | 1.6  |
| Chl                                                      | 0.1  | 0.1    | 0.1     | 0.1    | 0.1    | 0.1  |
| FFOA                                                     | 0.2  | 0.3    | 0.3     | -0.3   | 0.3    | 0.1  |
| BBOA                                                     | 0.1  | 0.2    | 0.2     | 0.0    | 0.4    | 0.2  |
| OOA1                                                     | 0.0  | 0.1    | 0.2     | 0.6    | 1.2    | 2.0  |

|                                           |       |      |      |       |      |      |
|-------------------------------------------|-------|------|------|-------|------|------|
| OOA2                                      | 0.0   | 0.1  | 0.1  | 0.3   | 0.7  | 0.8  |
| PM <sub>1</sub> /PM <sub>2.5</sub> (%)    |       |      |      |       |      |      |
| Org                                       | 93.8  | 95.4 | 94.3 | 97.1  | 84.7 | 83.0 |
| NO <sub>3</sub>                           | 96.2  | 95.1 | 93.7 | 90.8  | 78.0 | 72.3 |
| SO <sub>4</sub>                           | 100.0 | 95.2 | 90.0 | 88.6  | 75.0 | 66.7 |
| NH <sub>4</sub>                           | 94.7  | 94.6 | 93.6 | 89.5  | 78.2 | 71.4 |
| Chl                                       | 66.7  | 85.7 | 88.9 | 88.9  | 85.7 | 83.3 |
| FFOA                                      | 86.7  | 94.3 | 95.1 | 106.1 | 92.7 | 97.1 |
| BBOA                                      | 88.9  | 94.6 | 94.6 | 100.0 | 84.6 | 90.5 |
| OOA1                                      | 100.0 | 97.9 | 96.3 | 91.0  | 82.1 | 72.6 |
| OOA2                                      | 100.0 | 93.3 | 95.0 | 88.5  | 73.1 | 69.2 |
| TSP-PM <sub>1</sub> (μg m <sup>-3</sup> ) |       |      |      |       |      |      |
| Org                                       | 0.7   | 1.0  | 1.0  | 0.5   | 2.5  | 3.8  |
| NO <sub>3</sub>                           | 0.2   | 0.5  | 0.9  | 1.2   | 3.4  | 6.4  |
| SO <sub>4</sub>                           | 0.0   | 0.1  | 0.3  | 0.3   | 1.1  | 1.7  |
| NH <sub>4</sub>                           | 0.1   | 0.2  | 0.4  | 0.5   | 1.3  | 2.4  |
| Chl                                       | 0.1   | 0.3  | 0.1  | 0.1   | 0.2  | 0.2  |
| FFOA                                      | 0.3   | 0.3  | 0.4  | -0.2  | 0.5  | 0.2  |
| BBOA                                      | 0.3   | 0.2  | 0.2  | 0.1   | 0.4  | 0.3  |
| OOA1                                      | 0.1   | 0.1  | 0.2  | 0.6   | 1.2  | 2.7  |
| OOA2                                      | 0.0   | 0.1  | 0.2  | 0.3   | 0.8  | 1.1  |
| PM <sub>1</sub> /TSP(%)                   |       |      |      |       |      |      |
| Org                                       | 89.6  | 93.5 | 94.3 | 97.1  | 84.2 | 76.3 |
| NO <sub>3</sub>                           | 96.2  | 95.1 | 93.0 | 92.1  | 77.5 | 64.2 |
| SO <sub>4</sub>                           | 100.0 | 95.2 | 90.0 | 91.2  | 71.1 | 56.4 |
| NH <sub>4</sub>                           | 94.7  | 94.6 | 91.7 | 91.1  | 76.8 | 62.5 |
| Chl                                       | 66.7  | 66.7 | 88.9 | 88.9  | 75.0 | 71.4 |
| FFOA                                      | 81.3  | 94.3 | 93.5 | 104.0 | 88.4 | 94.4 |
| BBOA                                      | 72.7  | 94.6 | 94.6 | 97.0  | 84.6 | 86.4 |
| OOA1                                      | 97.0  | 97.9 | 96.3 | 91.0  | 82.1 | 66.3 |
| OOA2                                      | 100.0 | 93.3 | 90.5 | 88.5  | 70.4 | 62.1 |

*4. How about moving the nafion dryer in front of the cyclone impactors? Will this solve the hygroscopic influence on cut-off sizes*

We thank the reviewer's comments. The particles affected by hygroscopic growth and activation were collected by three different cyclone impactors and then dried by nafion dryer. And hence the physicochemical properties of these particles were characterized by following instruments. Indeed, by drying the particles before collection via impactors, regardless of high RH, saturated foggy or cloudy conditions, the aerosols would revert to their size under dry conditions. As a result, the three impactors will collect almost identical particles due to the small proportion of dry aerosols in particle sizes larger than 1 μm, thus unable to reflect the hygroscopic and activation characteristics of particles in ambient air. Therefore, in order to eliminate aerosol hygroscopic growth and activation during sampling, it is advisable to first dry the

samples and then select different size ranges using impactors.

## References

- Fu, G. Q., Xu, W. Y., Yang, R. F., Li, J. B., and Zhao, C. S.: The distribution and trends of fog and haze in the North China Plain over the past 30 years, *Atmos. Chem. Phys.*, 14, 11949-11958, 10.5194/acp-14-11949-2014, 2014.
- Kuang, Y., Xu, W., Tao, J., Luo, B., Liu, L., Xu, H., Xu, W., Xue, B., Zhai, M., Liu, P., and Sun, Y.: Divergent Impacts of Biomass Burning and Fossil Fuel Combustion Aerosols on Fog-Cloud Microphysics and Chemistry: Novel Insights From Advanced Aerosol-Fog Sampling, *Geophysical Research Letters*, 51, e2023GL107147, <https://doi.org/10.1029/2023GL107147>, 2024.
